# Supplementary figures and images for: Hsf1 and Hsp70 constitute a two-component feedback loop that regulates the yeast heat shock response
Source: eLife journal article supplement (doi:10.7554/elife.31668), 2018-02-02

Figure 6—figure supplement 1

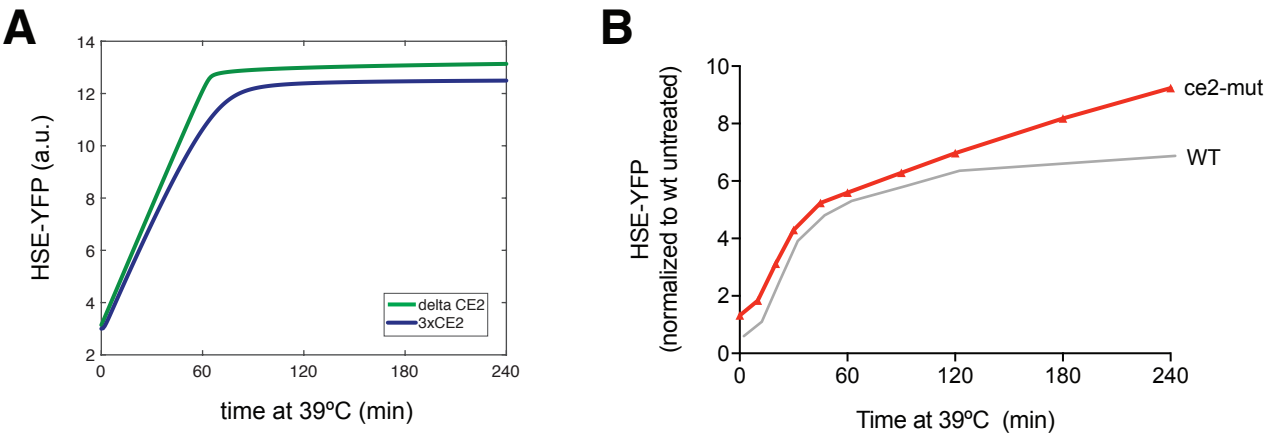

Supplement: supp [file elife-31668-supp-v1.zip]

## Figure 1—figure supplement 1

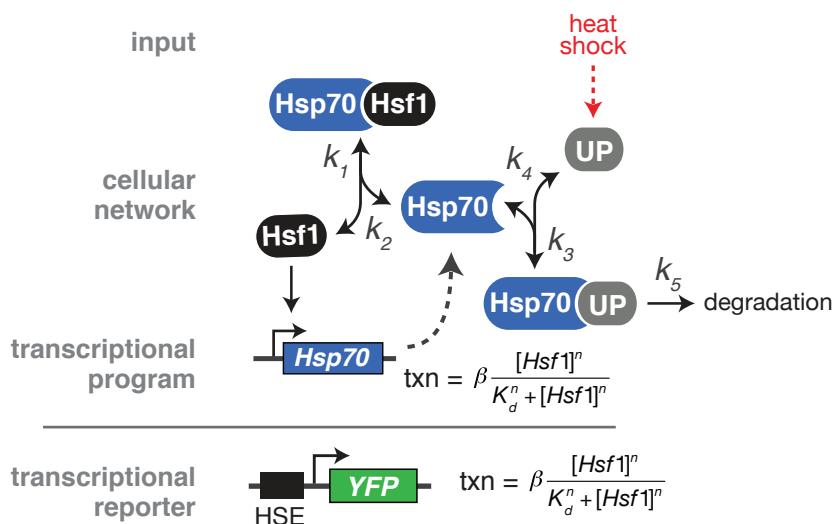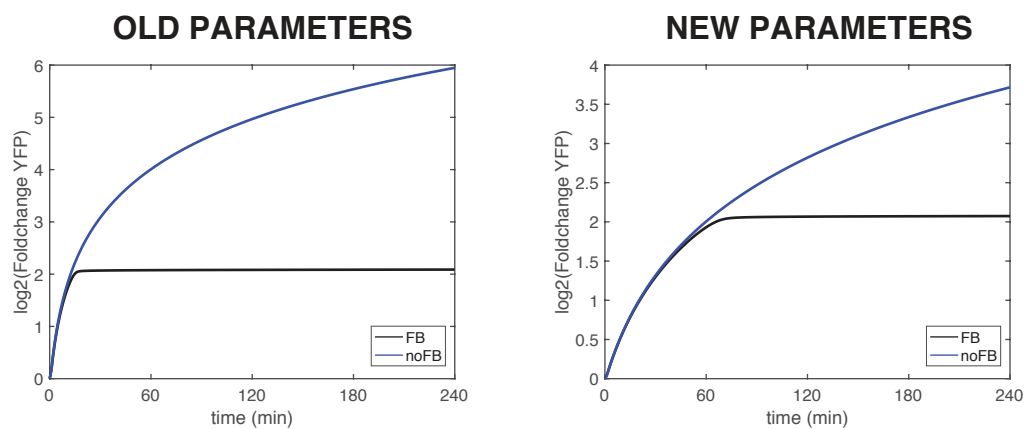

Supplement: supp [file elife-31668-supp-v1.zip]

Figure 3—figure supplement 1

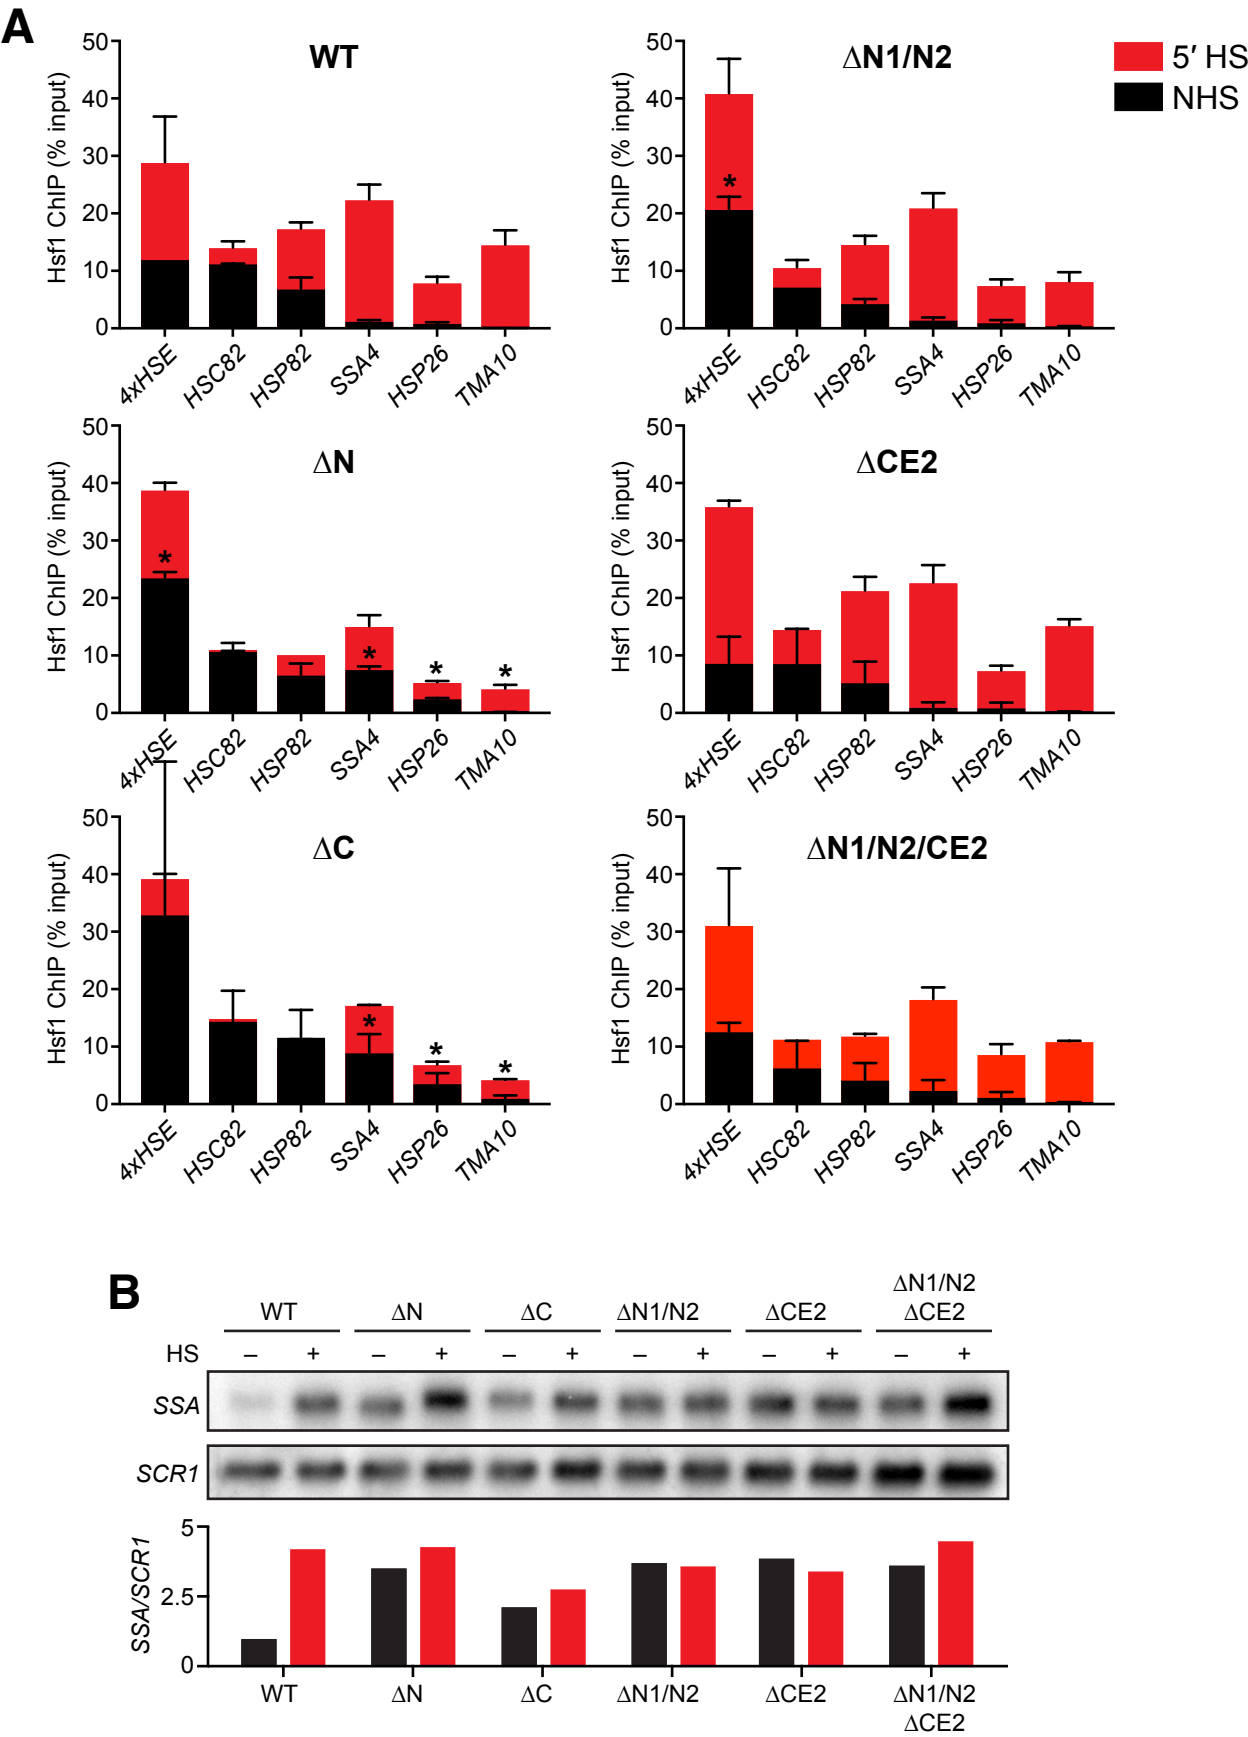

Supplement: supp [file elife-31668-supp-v1.zip]

Figure 2—figure supplement 1

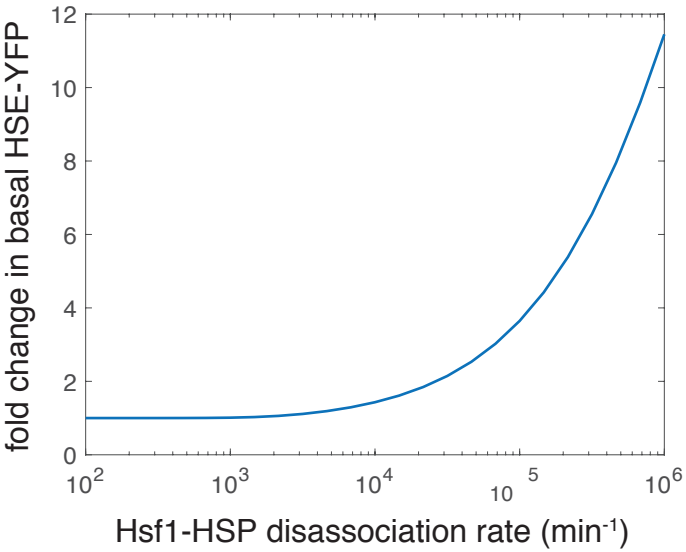

Supplement: supp [file elife-31668-supp-v1.zip]

Figure 4—figure supplement 1

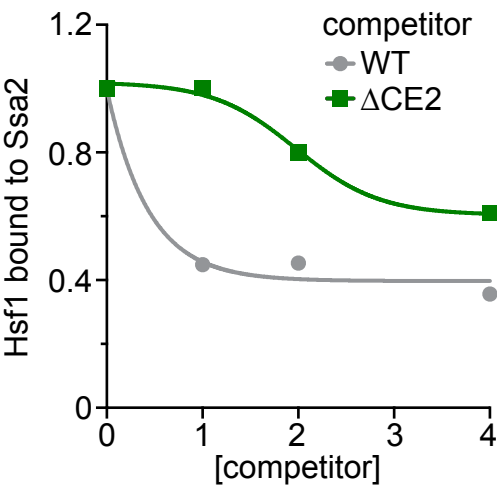

Supplement: supp [file elife-31668-supp-v1.zip]
